# Supplementary material
Source: PubMed Central journal article supplement (PMC4445617)
Supplement: mt2014214x1.pdf [file mt2014214x1.pdf]

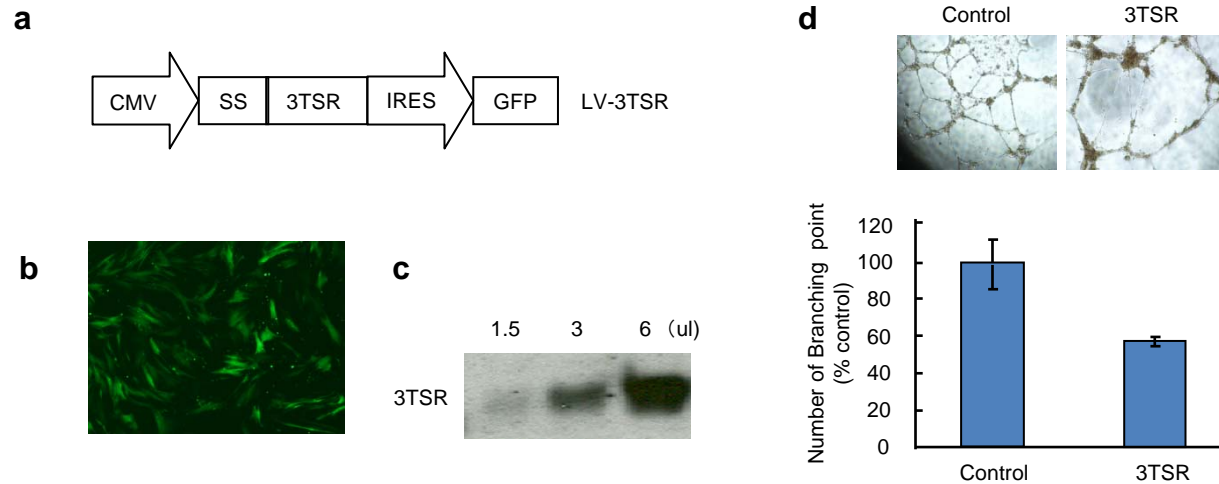

**Supplementary Figure 1. Characterization of SS-3TSR lentiviral vector:** (a) Design of lentiviral vectors (LV) expressing secretable 3TSR. Signal sequence of human Flt3 ligand (SS) was fused into N-terminus of 3TSR. The complementary DNA was cloned after the cytomegalovirus (CMV) promoter in LV-CSCIG, which also bears an internal ribosomal entry site (IRES) and GFP. (b) Representative GFP fluorescence image of human mesenchymal stem cells (MSCs) transduced with LV-3TSR. (c) 3TSR was detected by Western blot analysis from the conditioned medium of MSC-3TSR. (d) 3TSR has anti-angiogenic activity on human brain microvascular endothelial cells (HBMVECs). HBMVECs were plated on matrigel and treated with conditioned media from MSC-GFP (control) and MSC-3TSR for 48h. Images of branch points of HBMVECs (top). Comparison of the number of average branch point (bottom).

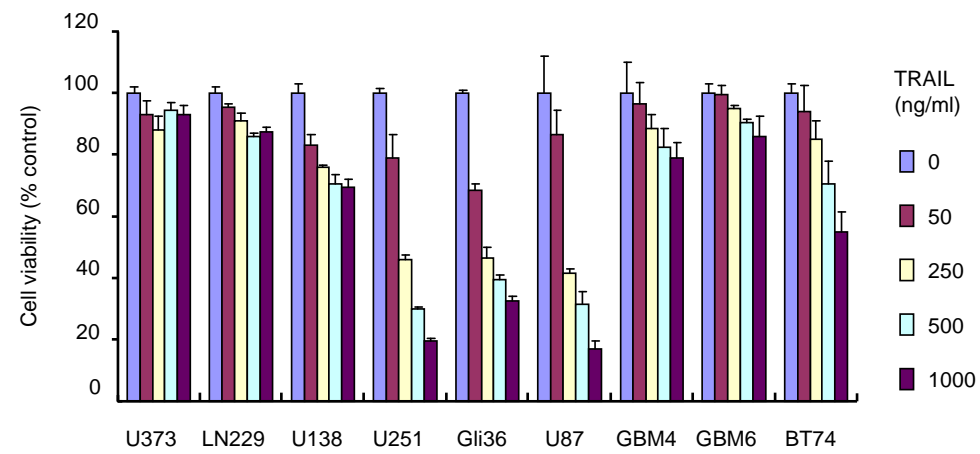

**Supplementary Figure 2.** S-TRAIL sensitivity was estimated using Celltiter-Glow cell viability assay in established and patient-derived primary GBM lines incubated with different dose of S-TRAIL for 48h.

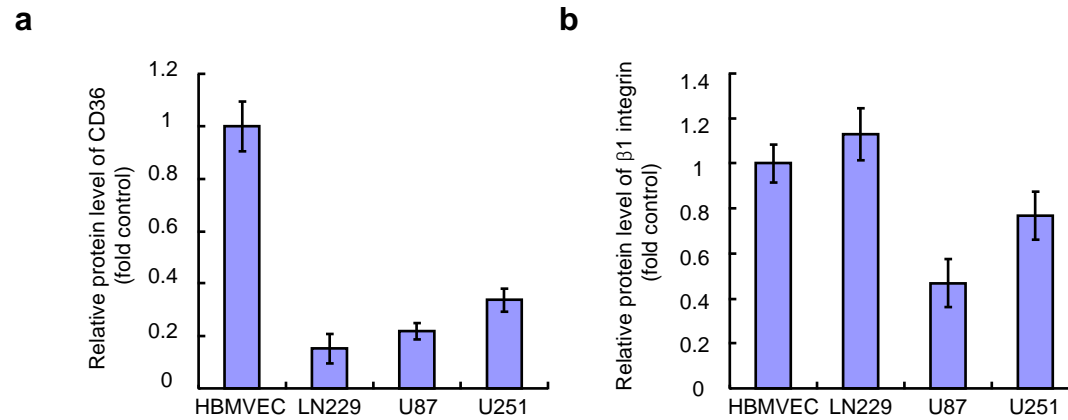

**Supplementary Figure 3.** Relative protein levels of CD36 (a) and  $\beta$  1 integrin (b) were estimated by normalizing band intensity of CD36 and  $\beta$  1 integrin by that of loading control  $\beta$ -actin and ERK as shown in Figure 1f. Western blotting was performed three times and Image J was used to measure the intensity of protein bands.

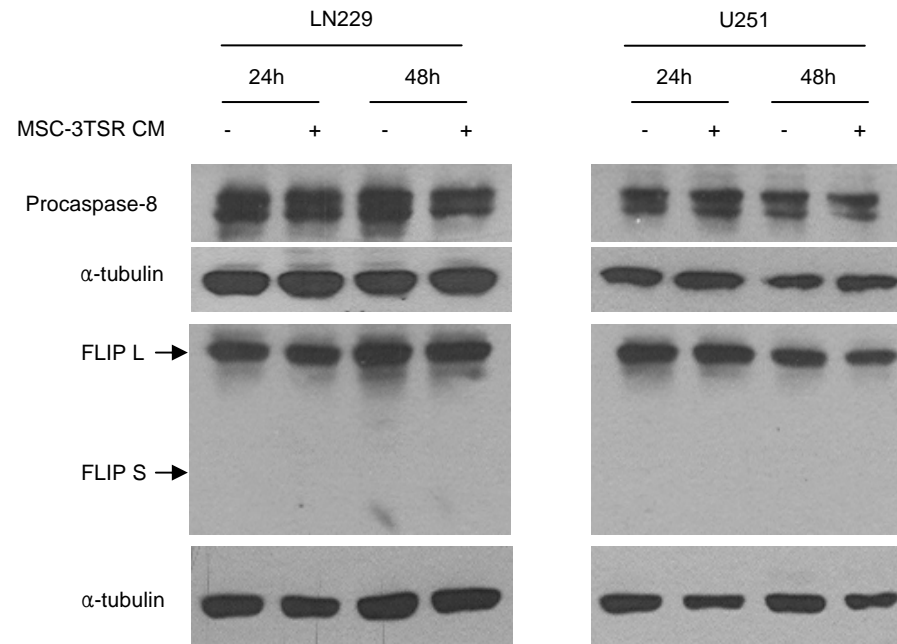

**Supplementary Figure 4.** LN229 and U251 were incubated with MSC-3TSR conditioned media for indicated time and protein levels of procaspase-8 and FLIP L were detected by western blotting.

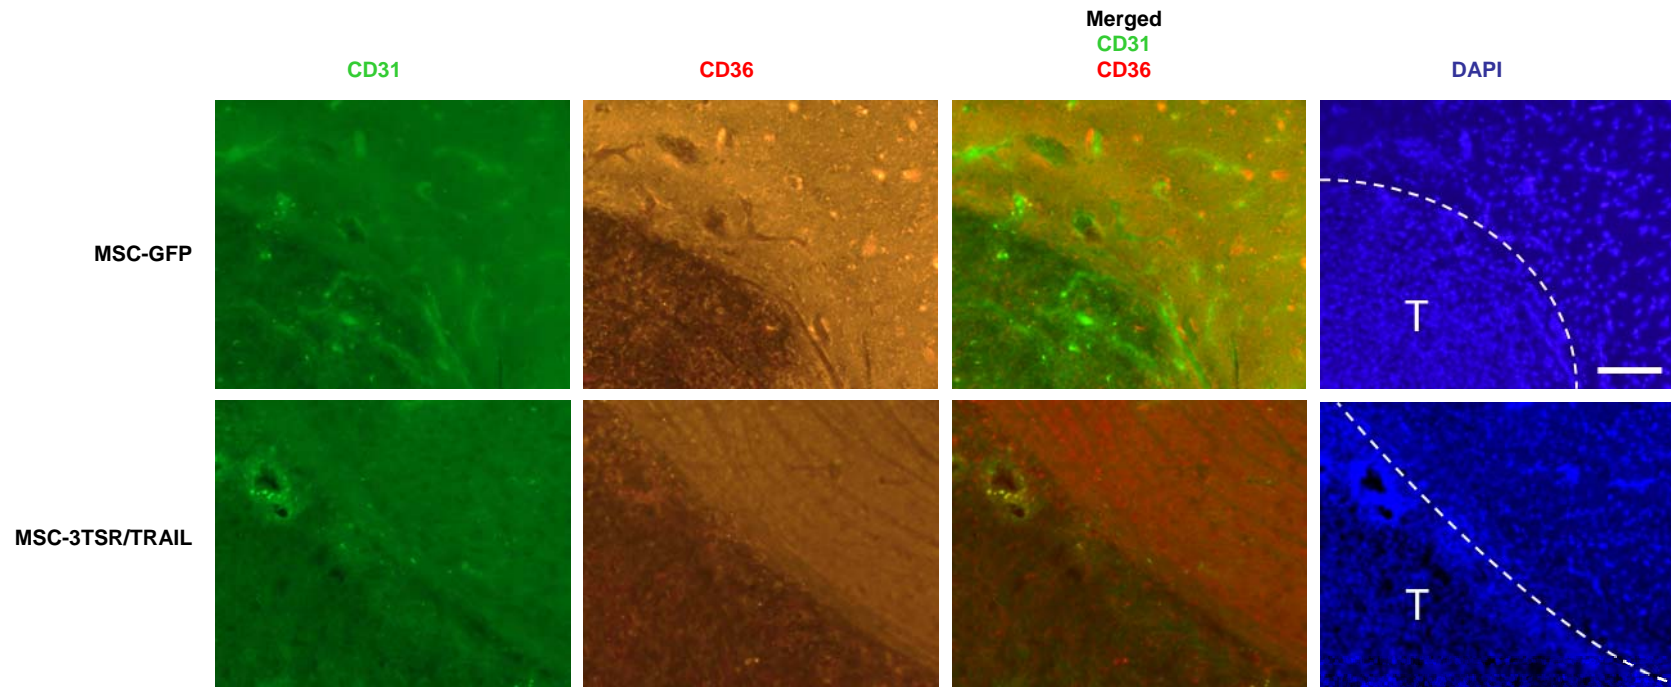

**Supplementary Figure 5.** Immunofluorescence staining images of CD36 and endothelial cell marker CD31 on brain sections from LN229-Fluc-mCherry GBM-bearing mice treated with MSC-GFP or MSC-3TSR/TRAIL. MSCs were intratumorally injected 10 days after tumor implantation. Brain sections were prepared from mice sacrificed at day 5 after MSC injection. Scale bar represents 100  $\mu$ m. Tumor area is shown as “T” on DAPI stained images.

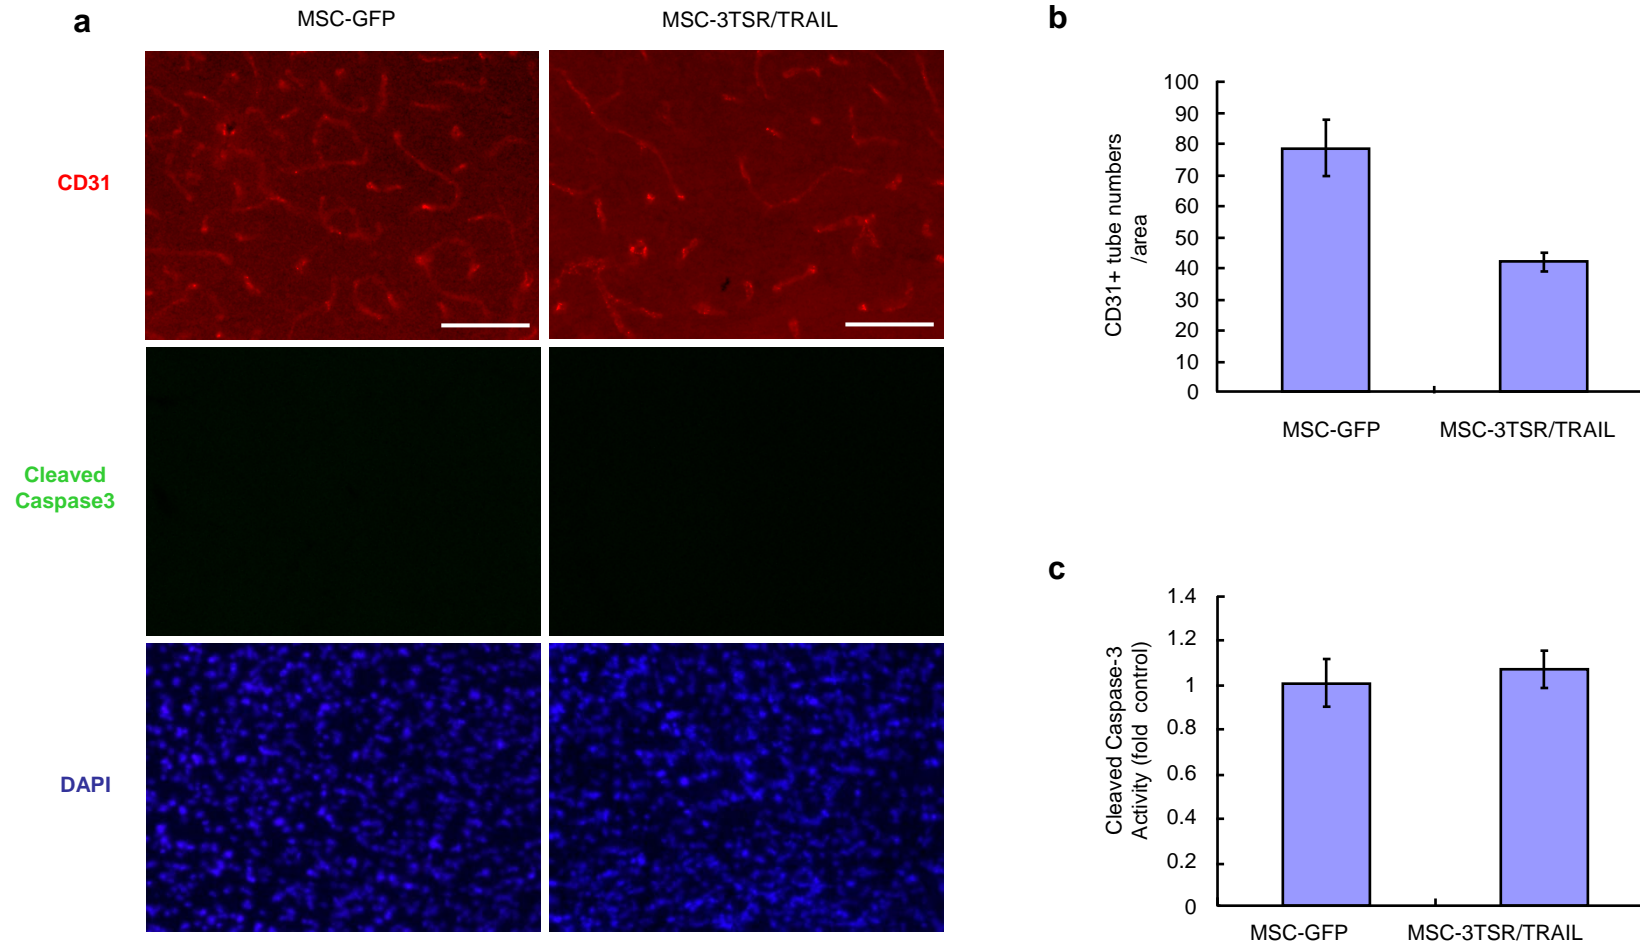

**Supplementary Figure 6.** MSC-GFP and MSC-3TSR/TRAIL were implanted intracranially into normal mice brain (n=3) and brain sections were prepared from mice sacrificed at day 5 after MSC injection. (a) Immunofluorescence images of endothelial cells stained by anti-CD31. Apoptotic cells were stained by cleaved caspase-8. Images was taken from area of brain section around MSCs (about 200 $\mu$ m apart from MSCs). Scale bar represents 200 $\mu$ m. (b) the number of branched tubes were compared in the area (890 $\mu$ m X 752 $\mu$ m , n=9 each) (p<0.01) (c) Signal intensity of cleaved caspase-3 was compared between two MSCs (p=0,69). ImageJ was used to measure fluorescent intensity of cleaved caspase-3.
